# Supplementary material for: US-Guided Percutaneous Radiofrequency versus Microwave Ablation for Benign Thyroid Nodules: A Prospective Multicenter Study
Source: PubMed Central journal article supplement (PMC5573330; doi:10.1038/s41598-017-09930-7), 2017-08-25
Supplement: 41598_2017_9930_MOESM1_ESM.pdf [file 41598_2017_9930_MOESM1_ESM.pdf]

**US-Guided Percutaneous Radiofrequency versus Microwave  
Ablation for Benign Thyroid Nodules: A Prospective  
Multicenter Study**

Zhigang Cheng<sup>1</sup>, Ying Che<sup>2</sup>, Songyuan Yu<sup>3</sup>, Shurong Wang<sup>4</sup>, Dengke Teng<sup>5</sup>, Huixiong Xu<sup>6</sup>,  
Jianwei Li<sup>7</sup>, Desheng Sun<sup>8</sup>, Zhiyu Han<sup>1</sup>, and Ping Liang<sup>1\*</sup>

<sup>1</sup> Department of Interventional Ultrasound, Chinese PLA General Hospital, Beijing,  
100853, China

<sup>2</sup> Department of Ultrasound, the First Affiliated Hospital of Dalian Medical University,  
Dalian, 116011, Liaoning Province, China

<sup>3</sup> Department of Ultrasound, Tianyou Hospital Affiliated to Wuhan University of Science &  
Technology, Wuhan, 430046, Hubei Province, China

<sup>4</sup> Department of Ultrasound, Yantai Affiliated Hospital of Binzhou Medical University,  
Yantai, 264100, Shandong Province, China

<sup>5</sup> Department of Interventional Ultrasound, Chinese PLA No. 208 Hospital, Changchun,  
130062, Jilin Province, China

<sup>6</sup> Department of Medical Ultrasound, Shanghai Tenth People's Hospital, Ultrasound  
Research and Education Institute, Tongji University School of Medicine, Shanghai,  
200072, China

<sup>7</sup> Department of Ultrasound, Fujian Provincial Hospital, Fuzhou, 350001, Fujian Province,  
China

<sup>8</sup> Department of Ultrasound, Peking University Shenzhen Hospital, Shenzhen, 518036,  
Guangdong Province, China

\*Correspondence to: Ping Liang, MD, Professor of Medicine, Chief, Department of  
Interventional Ultrasound, Chinese PLA General Hospital, No. 28, Fuxing Road,  
Haidian District, Beijing, 100853, China, [liangping301@126.com](mailto:liangping301@126.com). Telephone:  
+86-10-66939530.

**Supplementary Table S1 The ablation parameters for BTN in the procedures  
for the RFA and MWA group**

| Ablation parameters | RFA group                         | MWA group                       | P value |
|---------------------|-----------------------------------|---------------------------------|---------|
| Sessions (one/two)  | 628/21                            | 573/30                          | 0.152   |
| Energy (J)          | 8,751.7±9,481.9<br>(1,750-83,475) | 9,136.6±6,707.7<br>(800-51,300) | 0.391   |
| Power output (W)    | 50.8±9.8(25-60)                   | 32.3±7.9(20-50)                 | 0.000   |
| Time (s)            | 193.4±237.5(35-1,855)             | 289.5±208.9(20-1,470)           | 0.000   |

Values are presented as the mean ± SD (range). BTN: benign thyroid nodules, RFA: radiofrequency ablation, MWA: microwave ablation, J: joule, W: Watt, s: second.
